# Supplementary material
Source: Research Square preprint supplement (doi:10.21203/rs.3.rs-10297474/v1)
Supplement: Supplementary file 1 [file 90ed6dcc6b20ea140d3f40a0.docx]

**Table S1. Bacterial strains used in this study**

| Strain | Relevant characteristics | Reference |
| --- | --- | --- |
| *Rhodococcus* sp. | | |
| RDE2 | Wild type; natural rubber degrader | (Gibu et al. 2022) |
| DR082 | ΔLPH33_RS08240 derivative of RDE2 | This study |
| DR179 | ΔLPH33_RS17900 derivative of RDE2 | This study |
| DR0817 | ΔLPH33_RS08240 ΔLPH33_RS17900 derivative of RDE2 | This study |
| *Escherichia coli* | | |
| NEB Turbo | F′ *proA*+*B*+ *lacI*q Δ*lacZ*M15 / *fhuA2* Δ(*lac*-*proAB*) *glnV* *galK16* *galE15* R(*zgb*-210::Tn10) TetS *endA1* thi-1 Δ(*hsdS*-*mcrB*)5 | New England Biolabs |
| BL21(DE3) | F– *ompT* *hsdSB* (rB– mB–) *gal* *dcm* (DE3) | Novagen |
| S17-1 | *pro* *hsdR* *hsdM*+ *thi* *recA*; RP4-2-Tc::Mu Km::Tn7 | (Simon et al. 1983) |

**Table S2. Plasmids used in this study**

| Plasmid | Relevant characteristicsa | Reference |
| --- | --- | --- |
| **Expression plasmids** | | |
| pCold I | Cold-shock expression vector; Apr | Takara |
| pColdI_02580_VH2 | pCold I carrying a 1.5-kb NdeI fragment of GPOL_c02580 (ALDH gene) of *G. polyisoprenivorans* VH2; Apr | This study |
| pColdI_08770_RDE2 | pCold I carrying a 1.2-kb NdeI fragment of LPH33_RS04445 (*lcp* gene) of RDE2; Apr | This study |
| pCRD041 | pCold I carrying a 1.5-kb NdeI fragment of LPH33_RS04160; Apr | This study |
| pCRD082 | pCold I carrying a 1.4-kb NdeI fragment of LPH33_RS08240; Apr | This study |
| pCRD179 | pCold I carrying a 1.6-kb NdeI fragment of LPH33_RS17900; Apr | This study |
| pCRD212 | pCold I carrying a 1.5-kb NdeI fragment of LPH33_RS21215; Apr | This study |
| pCRD217 | pCold I carrying a 1.5-kb NdeI fragment of LPH33_RS21770; Apr | This study |
| pCRD230 | pCold I carrying a 1.4-kb NdeI fragment of LPH33_RS23090; Apr | This study |
| **Gene-knockout plasmids** | | |
| pK18*mobsacB* | Mobilizable suicide vector for allelic replacement (*sacB*); Kmr | (Schäfer et al. 1994) |
| pKDR082 | pK18*mobsacB* carrying ~1.0-kb upstream and ~1.0-kb downstream regions flanking LPH33_RS08240; Kmr | This study |
| pKDR179 | pK18*mobsacB* carrying ~1.0-kb upstream and ~1.0-kb downstream regions flanking LPH33_RS17900; Kmr | This study |
| a Apr, Kmr, resistance to ampicillin and kanamycin, respectively. Locus tags follow the current RefSeq annotation (LPH33_RS…). *lcp* = LPH33_RS04445. | | |

**Table S3. Primers used in this study**

| Primer | Sequence (5′ to 3′) |
| --- | --- |
| **qRT-PCR analysis** | |
| LPH33_RS04160_F  LPH33_RS04160_R  LPH33_RS08240_F  LPH33_RS08240_R  LPH33_RS17900_F  LPH33_RS17900_R  LPH33_RS21215_F  LPH33_RS21215_R  LPH33_RS21770_F  LPH33_RS21770_R  LPH33_RS23090_F  LPH33_RS23090_R  recA_F  recA_R | AGCTTGGCGAAGTTGATCTG  GCACCGCTATCTGCTCAAG  GGATGCCGCTGAAGAACATC  ATCTCCTGGTCGTCGAAGTC  ATTCTTCGTCTGCTGGTAGTGG  TCGGTGGTTACAAGCAGTCC  CAAGGCAGCAAAGCTCATCG  AGCCCCGCATAGTAGTTGATTG  TGTGCTCGGCGATGATCTC  ATCGTCGCGTACAACTATCCG  AGTAGTTCACTCCCACGGTTC  ACGACACACCATTCGGTTTG  CGCGATCTTCATCAACCAGC  ACCGAGGCGTAGAACTTCAG |
| **Construction of ALDH gene expression plasmids** | |
| LPH33_RS04160IF_F  LPH33_RS04160IF_R  LPH33_RS08240IF_F  LPH33_RS08240IF_R  LPH33_RS17900IF_F  LPH33_RS17900IF_R  LPH33_RS21215IF_F  LPH33_RS21215IF_R  LPH33_RS21770IF_F  LPH33_RS21770IF_R  LPH33_RS23090IF_F  LPH33_RS23090IF_R | TCGAAGGTAGGCATATGACACTTCGCCCCACC  GTACCGAGCTCCATATCAGCTCGCGGGCTCGGC  TCGAAGGTAGGCATATGACCGACATTCTCGACC  GTACCGAGCTCCATATCAGCGCAGTATCGTCTTG  TCGAAGGTAGGCATATGACCGTGTACGCCCGT  GTACCGAGCTCCATATCAGAAGAAGCCCTGTGC  TCGAAGGTAGGCATATGACCGACTACGACAAGT  GTACCGAGCTCCATATCAGCCCTCGTAACCGAG  TCGAAGGTAGGCATATGTCAGTGCAGGAGAACG  GTACCGAGCTCCATATCACGAGGTCACCGCCTT  TCGAAGGTAGGCATATGCCTGTCATCAACAGCA  GTACCGAGCTCCATACTAGACGTATATCGACTTGT |
| **Construction of gene-knockout plasmids** | |
| LPH33_RS08240_up_F  LPH33_RS08240_up_R  LPH33_RS08240_dn_F  LPH33_RS08240_dn_R  LPH33_RS17900_up_F  LPH33_RS17900_up_R  LPH33_RS17900_dn_F  LPH33_RS17900_dn_R | TCGGTACCCGGGATCCTGAGCGAGAGGGGGTACAG  GGCGACGACCTCTTCGGTCG  GAAGAGGTCGTCGCCGGCGCCTTCAACACCGACGC  CGACTCTAGAGGATCGACAGGAGCAGCATGGATCT  CGGTACCCGGGGATCCACGAATGGAGTTGTTCGGC  GCCGCGAGCGACCTCGGTGA  GAGGTCGCTCGCGGCGTGTGGACGAACACCTACCA  CGACTCTAGAGGATCTGCGCGGCGATCACCTCGGC |
| **Confirmation of ALDH gene deletion** | |
| LPH33_RS08240CP_F  LPH33_RS08240CP_R  LPH33_RS17900CP_F  LPH33_RS17900CP_R | GCGATCGGTGTTCAGTTCGC  GAGGAAATGGCCGTCCTGGG  CGCCGTCACCGACGGTCAG  GTCGAGCGGGAGGAACTGGTC |


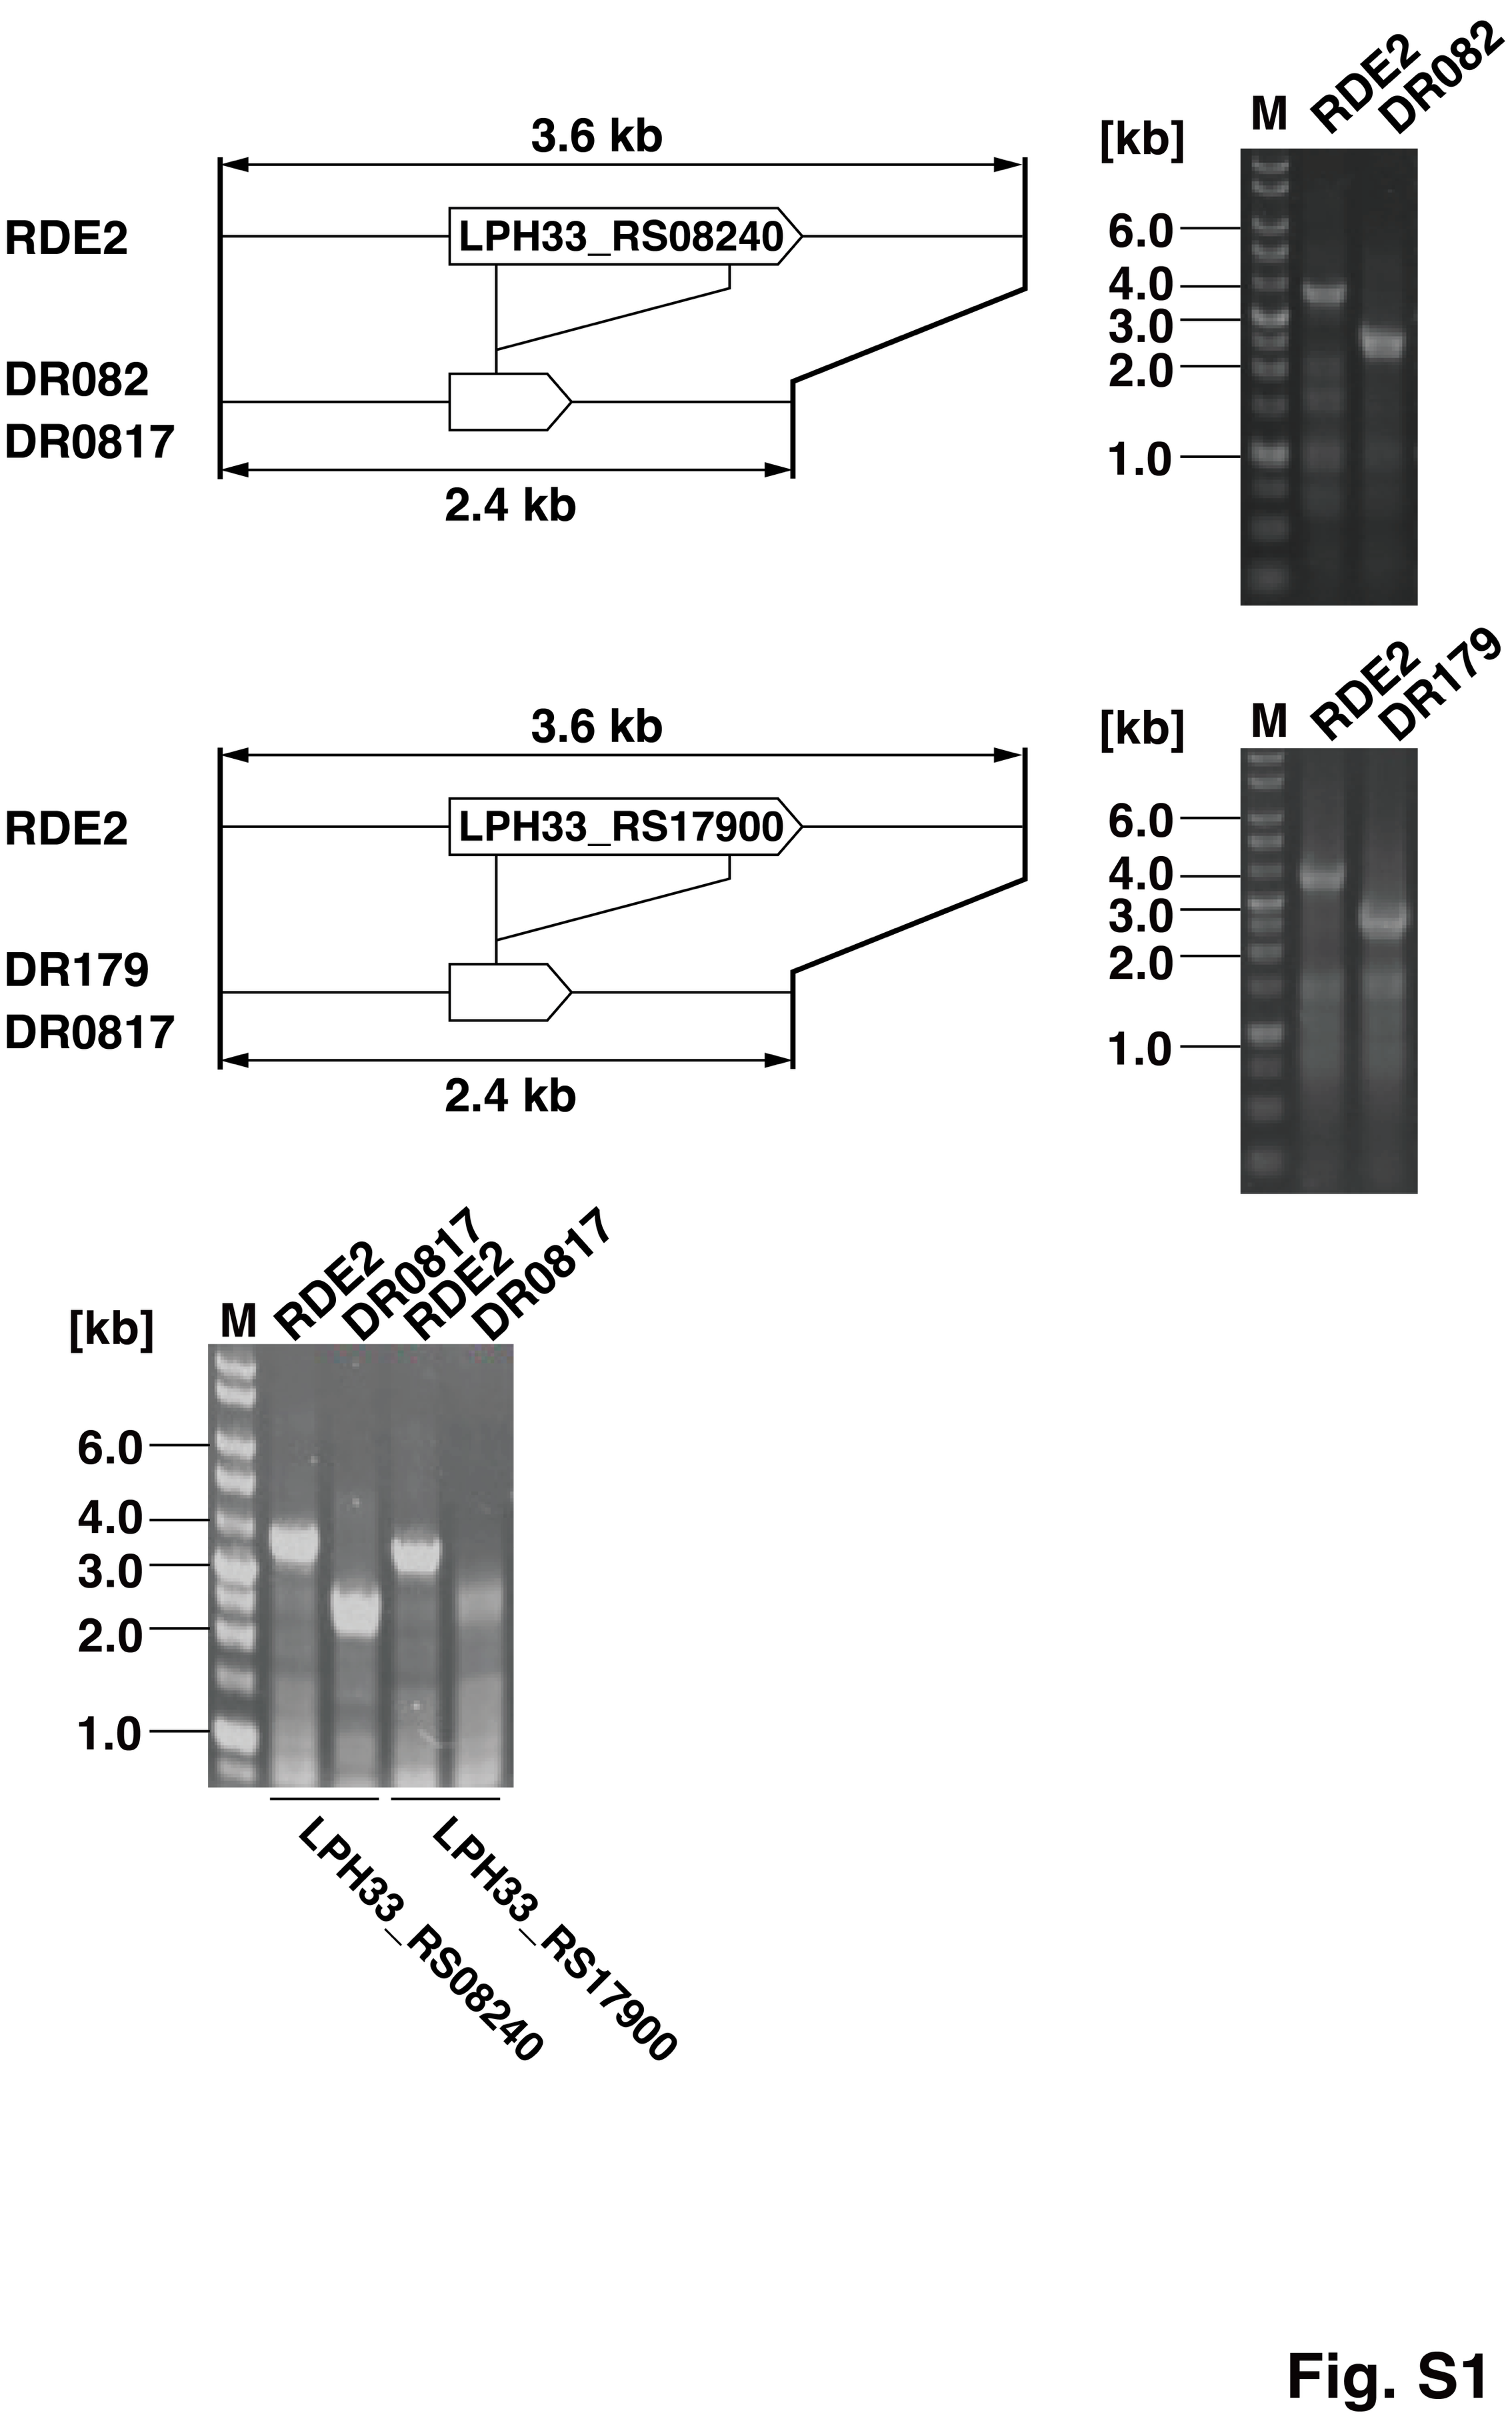


**Fig. S1.** Confirmation of ALDH gene deletions in RDE2 by genomic PCR. For each target locus, the chromosomal region spanning the gene was amplified with a primer pair annealing to the flanking sequences, and the products were resolved by agarose gel electrophoresis. Allelic replacement of the ~1.2-kb internal coding region reduces the amplicon from **3.6 kb (intact locus)** to **2.4 kb (deleted locus)**, as depicted in the schematic to the left of each gel. (Top) LPH33_RS08240 locus in wild-type RDE2 and the single mutant DR082; (Middle) LPH33_RS17900 locus in wild-type RDE2 and the single mutant DR179; (Bottom) both loci in wild-type RDE2 and the double mutant DR0817 (left two lanes, LPH33_RS08240; right two lanes, LPH33_RS17900). In every case, the wild type yielded the 3.6-kb product, whereas the corresponding deletion mutant yielded the 2.4-kb product, confirming replacement of each intact gene by the deleted allele. M, molecular size marker (sizes in kb shown on the left).


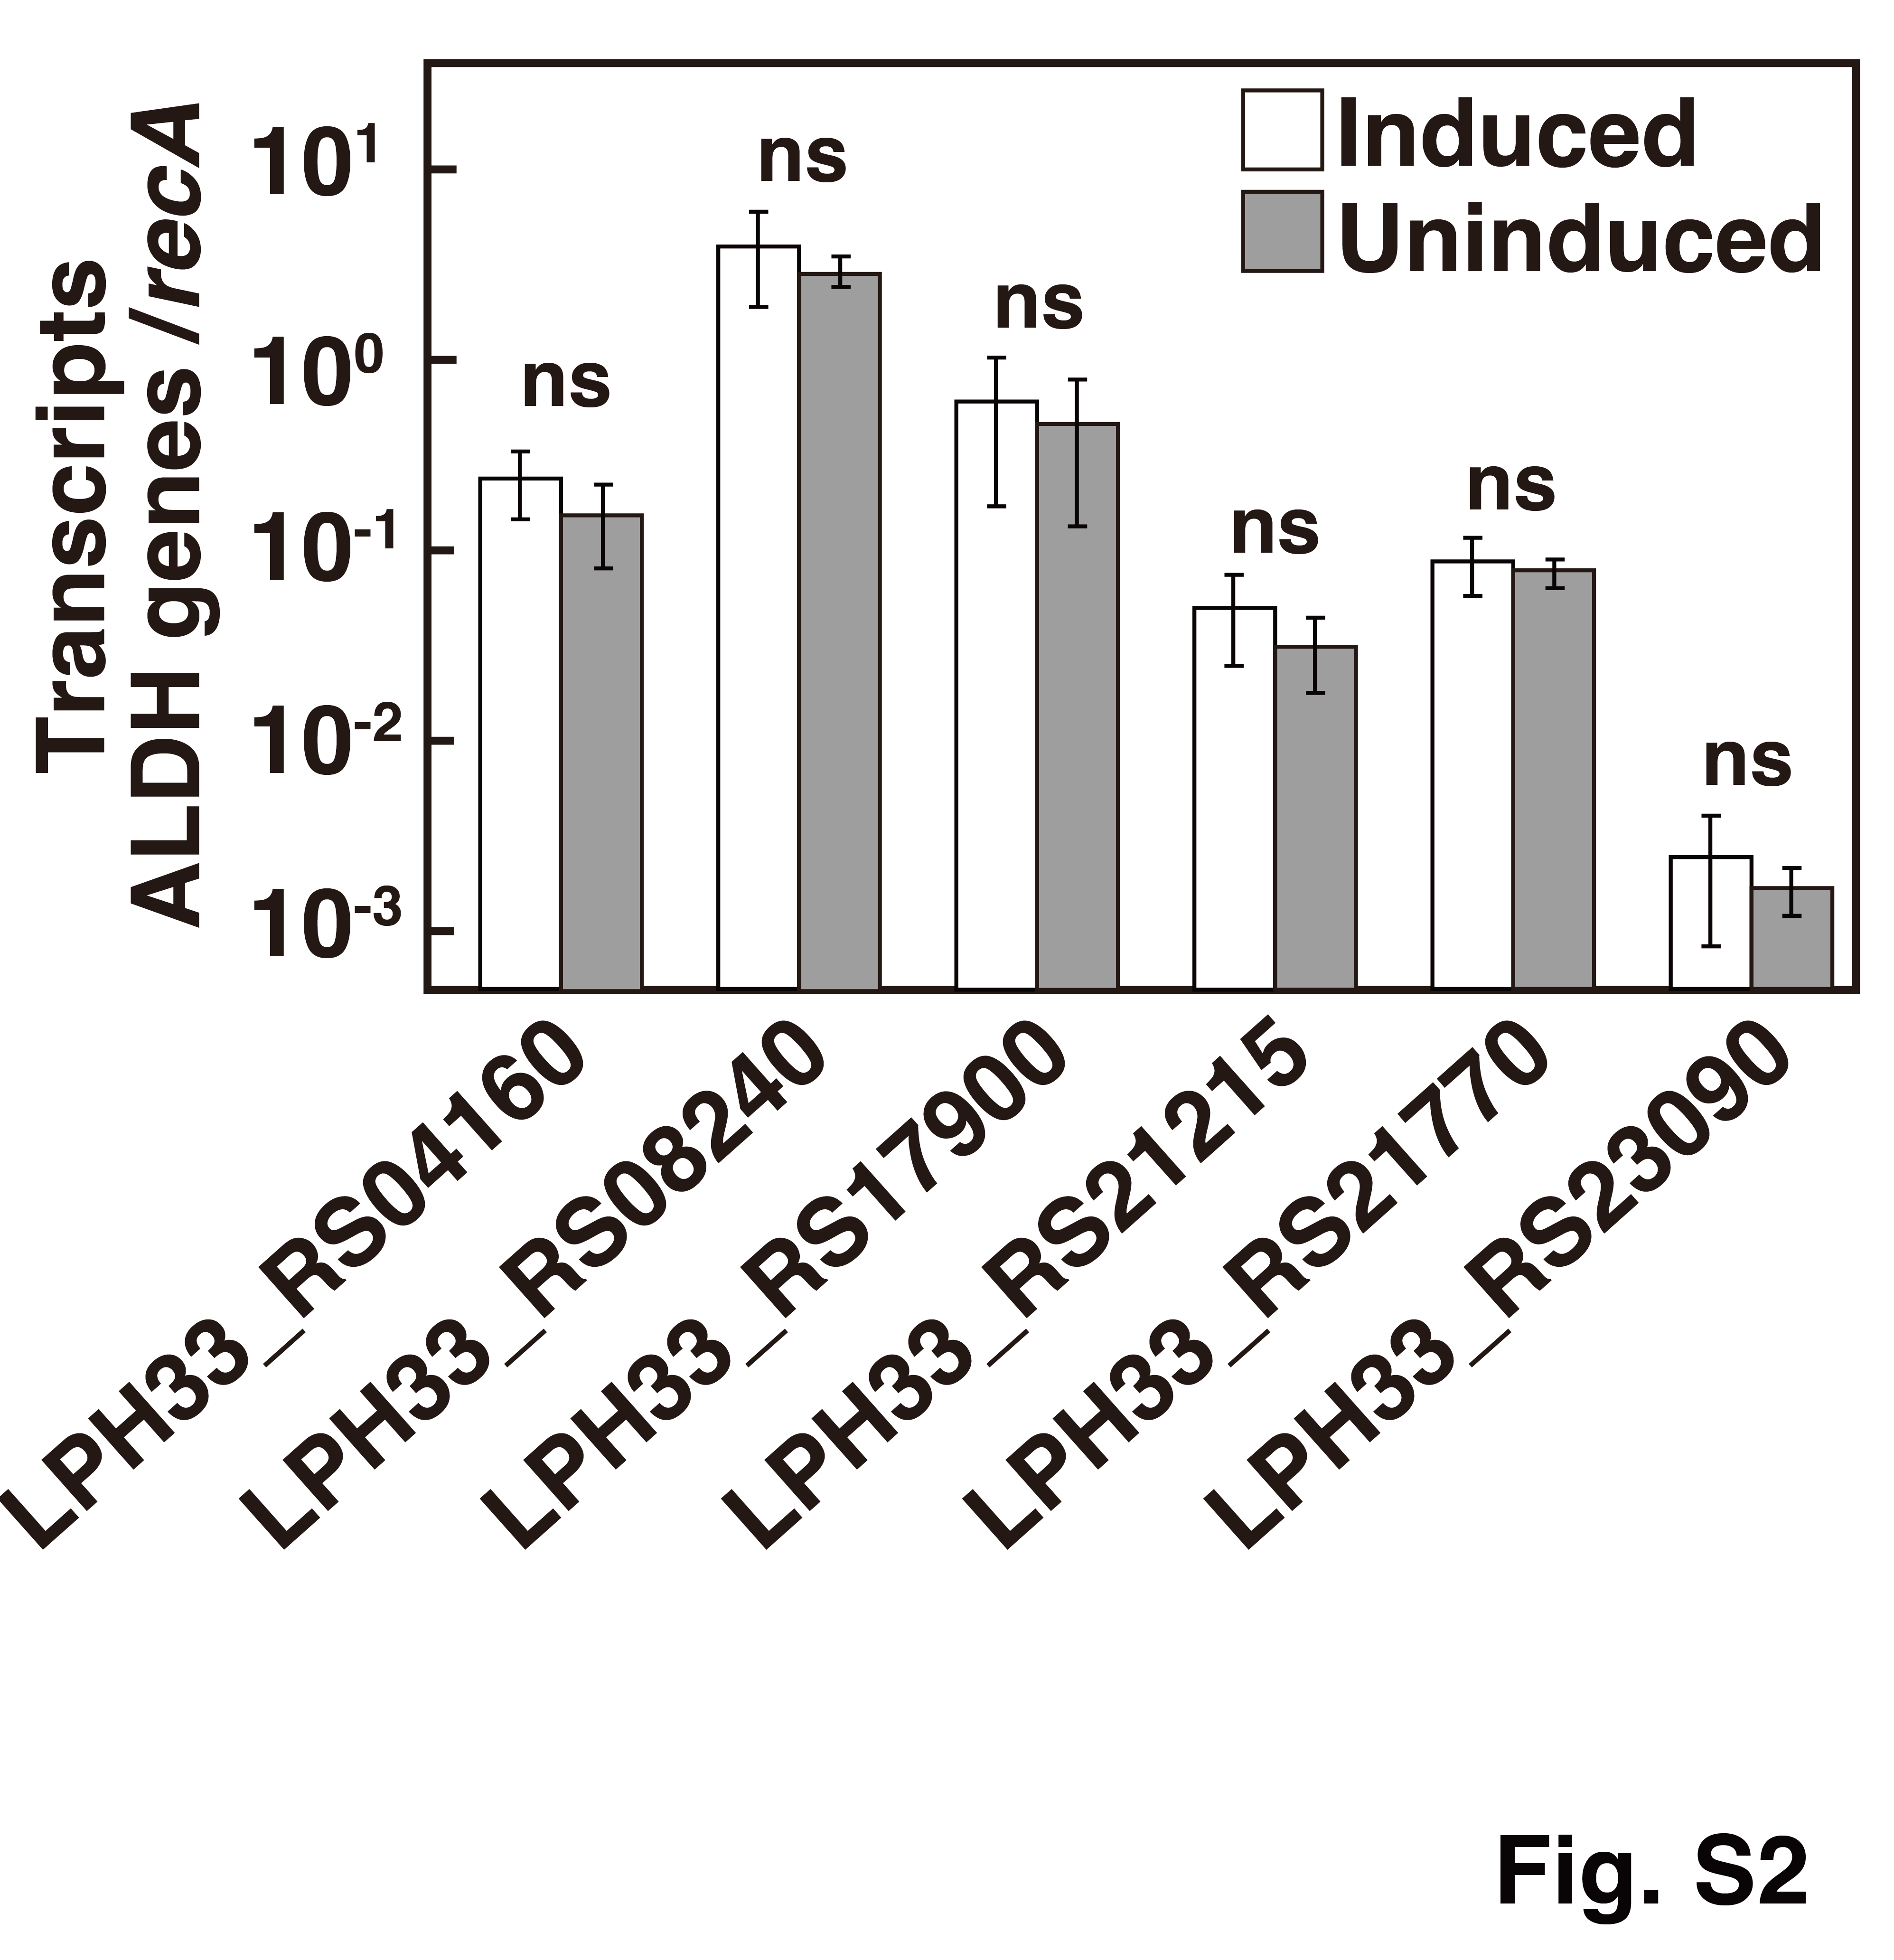


**Fig. S2.** Transcript levels of the six candidate ALDH genes in RDE2, as determined by quantitative reverse-transcription PCR (qRT-PCR). W medium containing 10 mM pyruvate alone (gray bars, uninduced) or 10 mM pyruvate plus 0.2% (w/v) DPNR (white bars, induced). Transcript levels of each candidate ALDH gene were normalized to that of *recA* (shown on a logarithmic scale). Values represent the mean ± standard deviation from n = 5 biological replicates. No significant differences were detected between conditions for any candidate (*p* > 0.05 by two-tailed Student's t-test); ns, not significant.


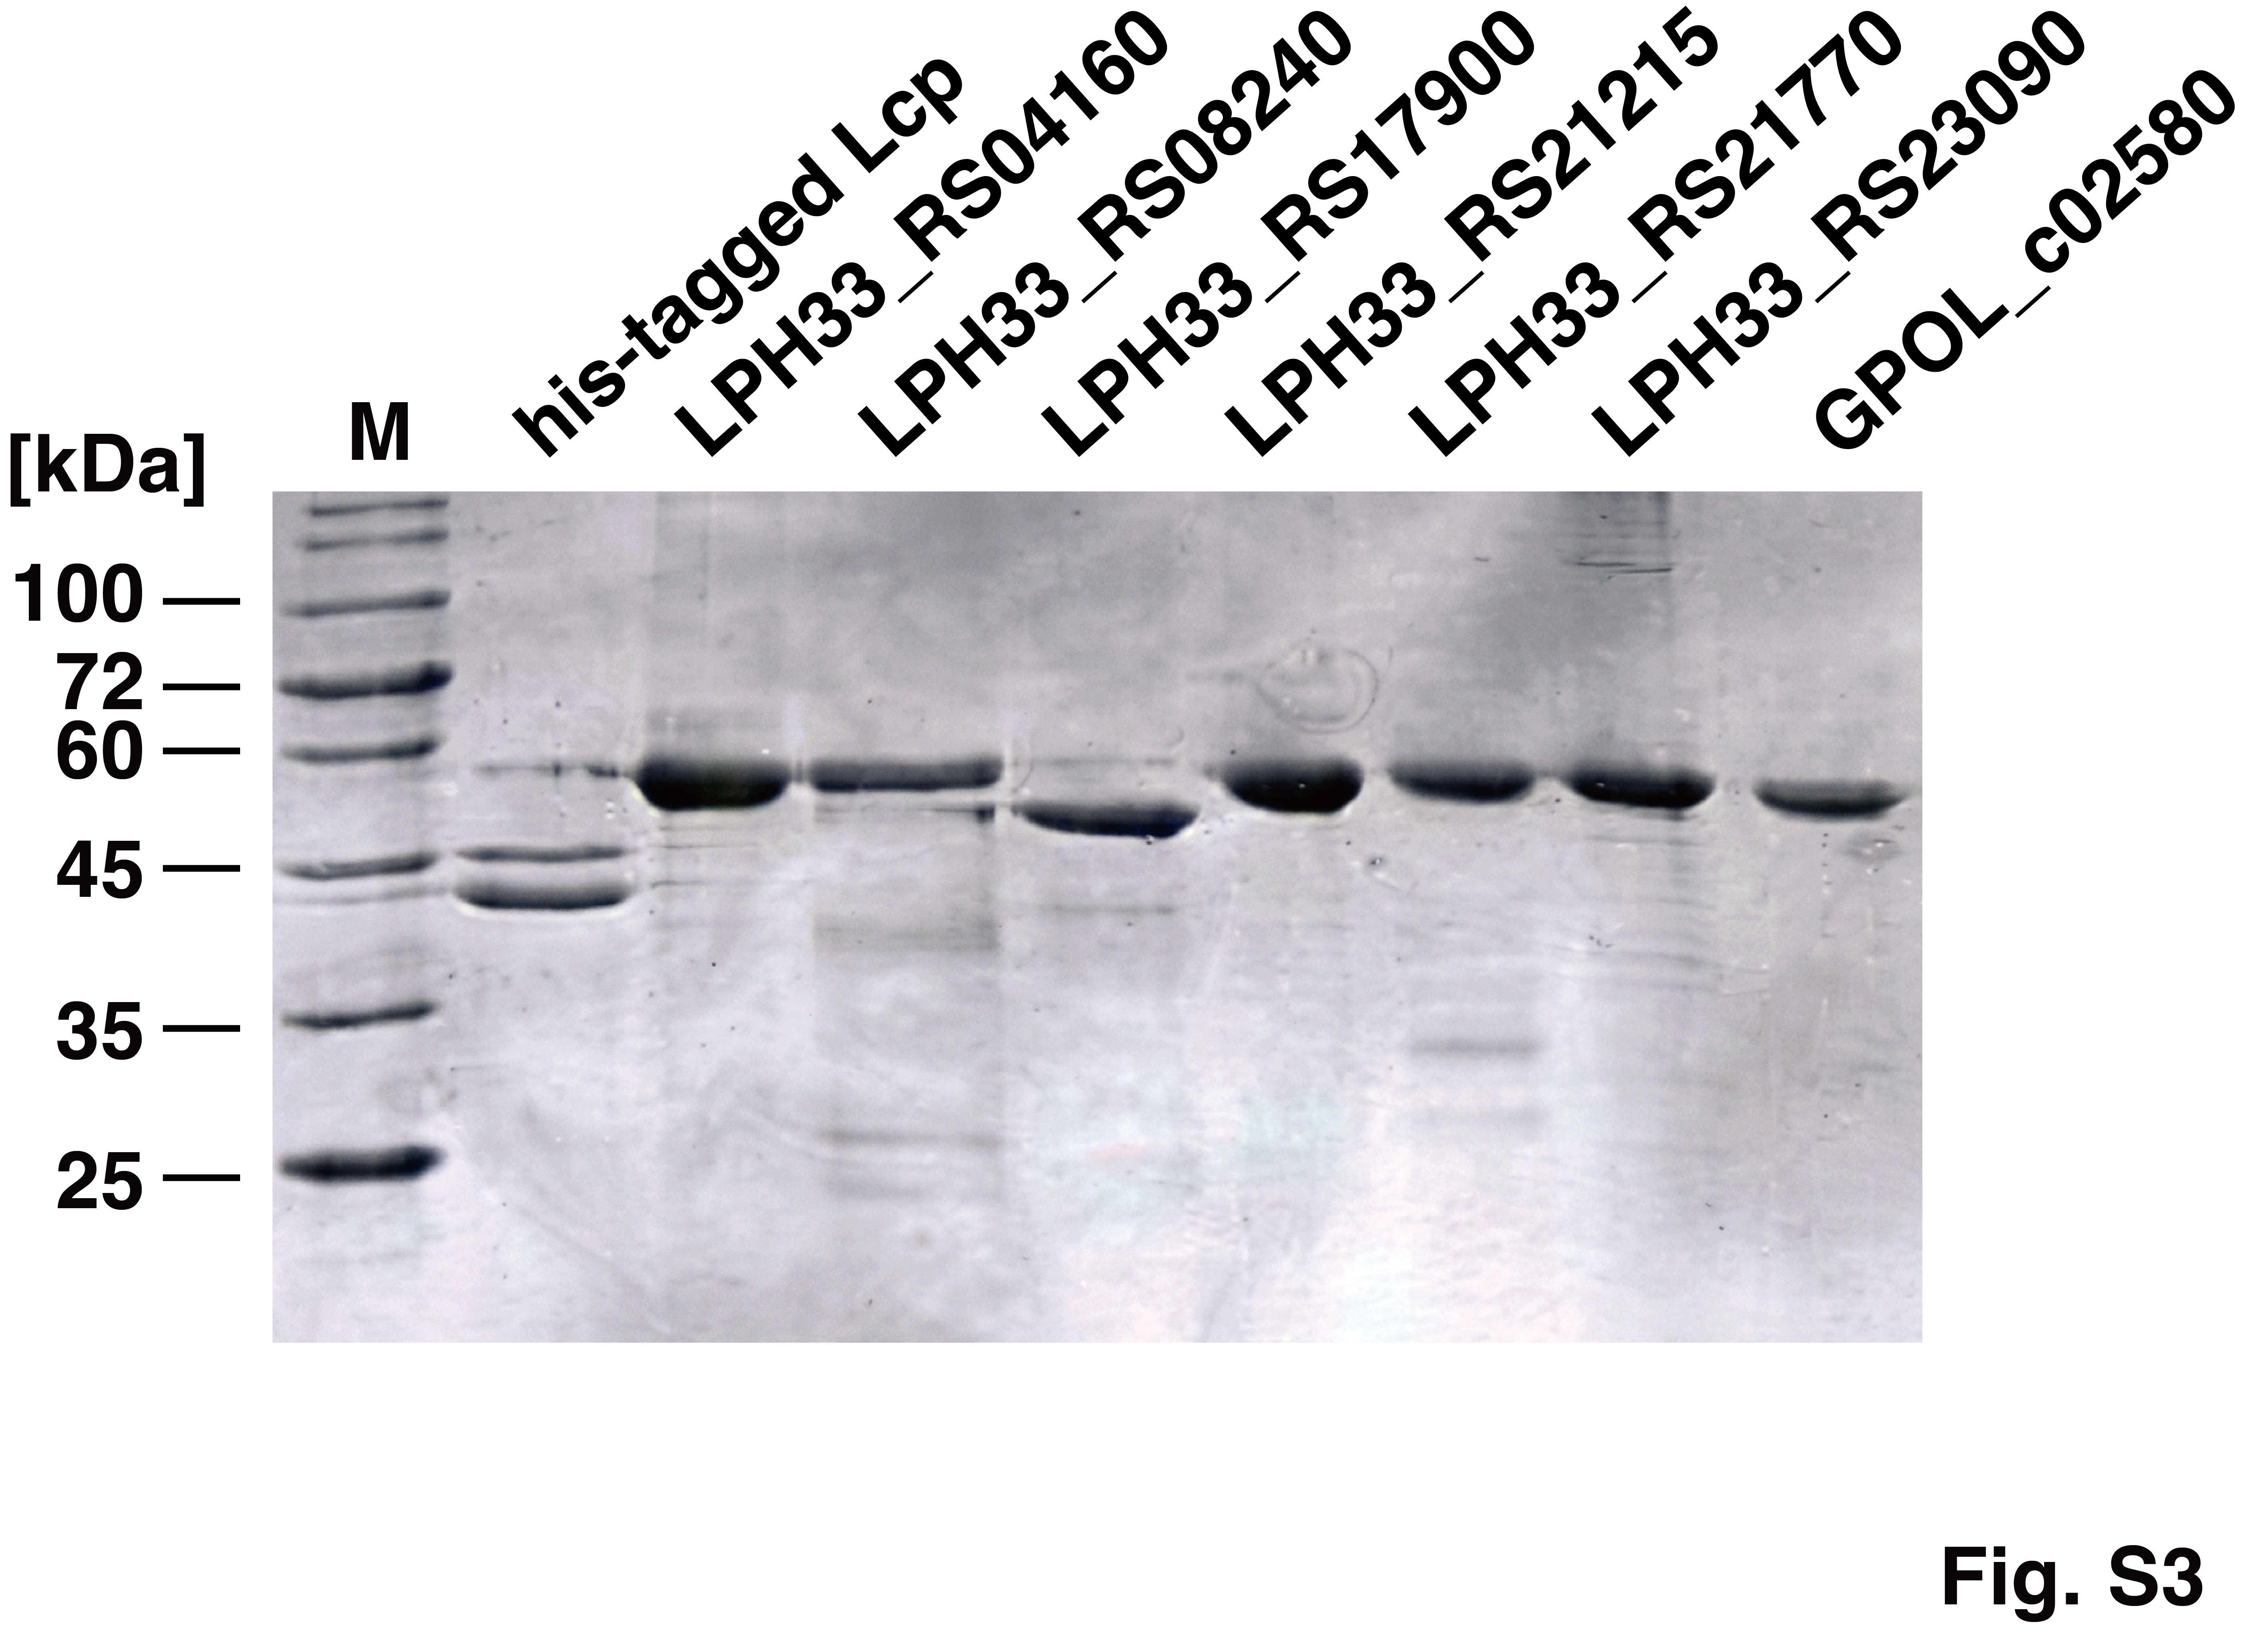


**Fig. S3.** SDS-PAGE analysis of the purified hexa-histidine-tagged Lcp and recombinant ALDHs used in this study. Each protein was heterologously expressed in Escherichia coli and purified by immobilized-metal affinity chromatography. Lane M, molecular mass markers (kDa). Each sample was loaded at 3 µg per lane. Proteins were separated on a 12% SDS-polyacrylamide gel and stained with Coomassie Brilliant Blue R-250.


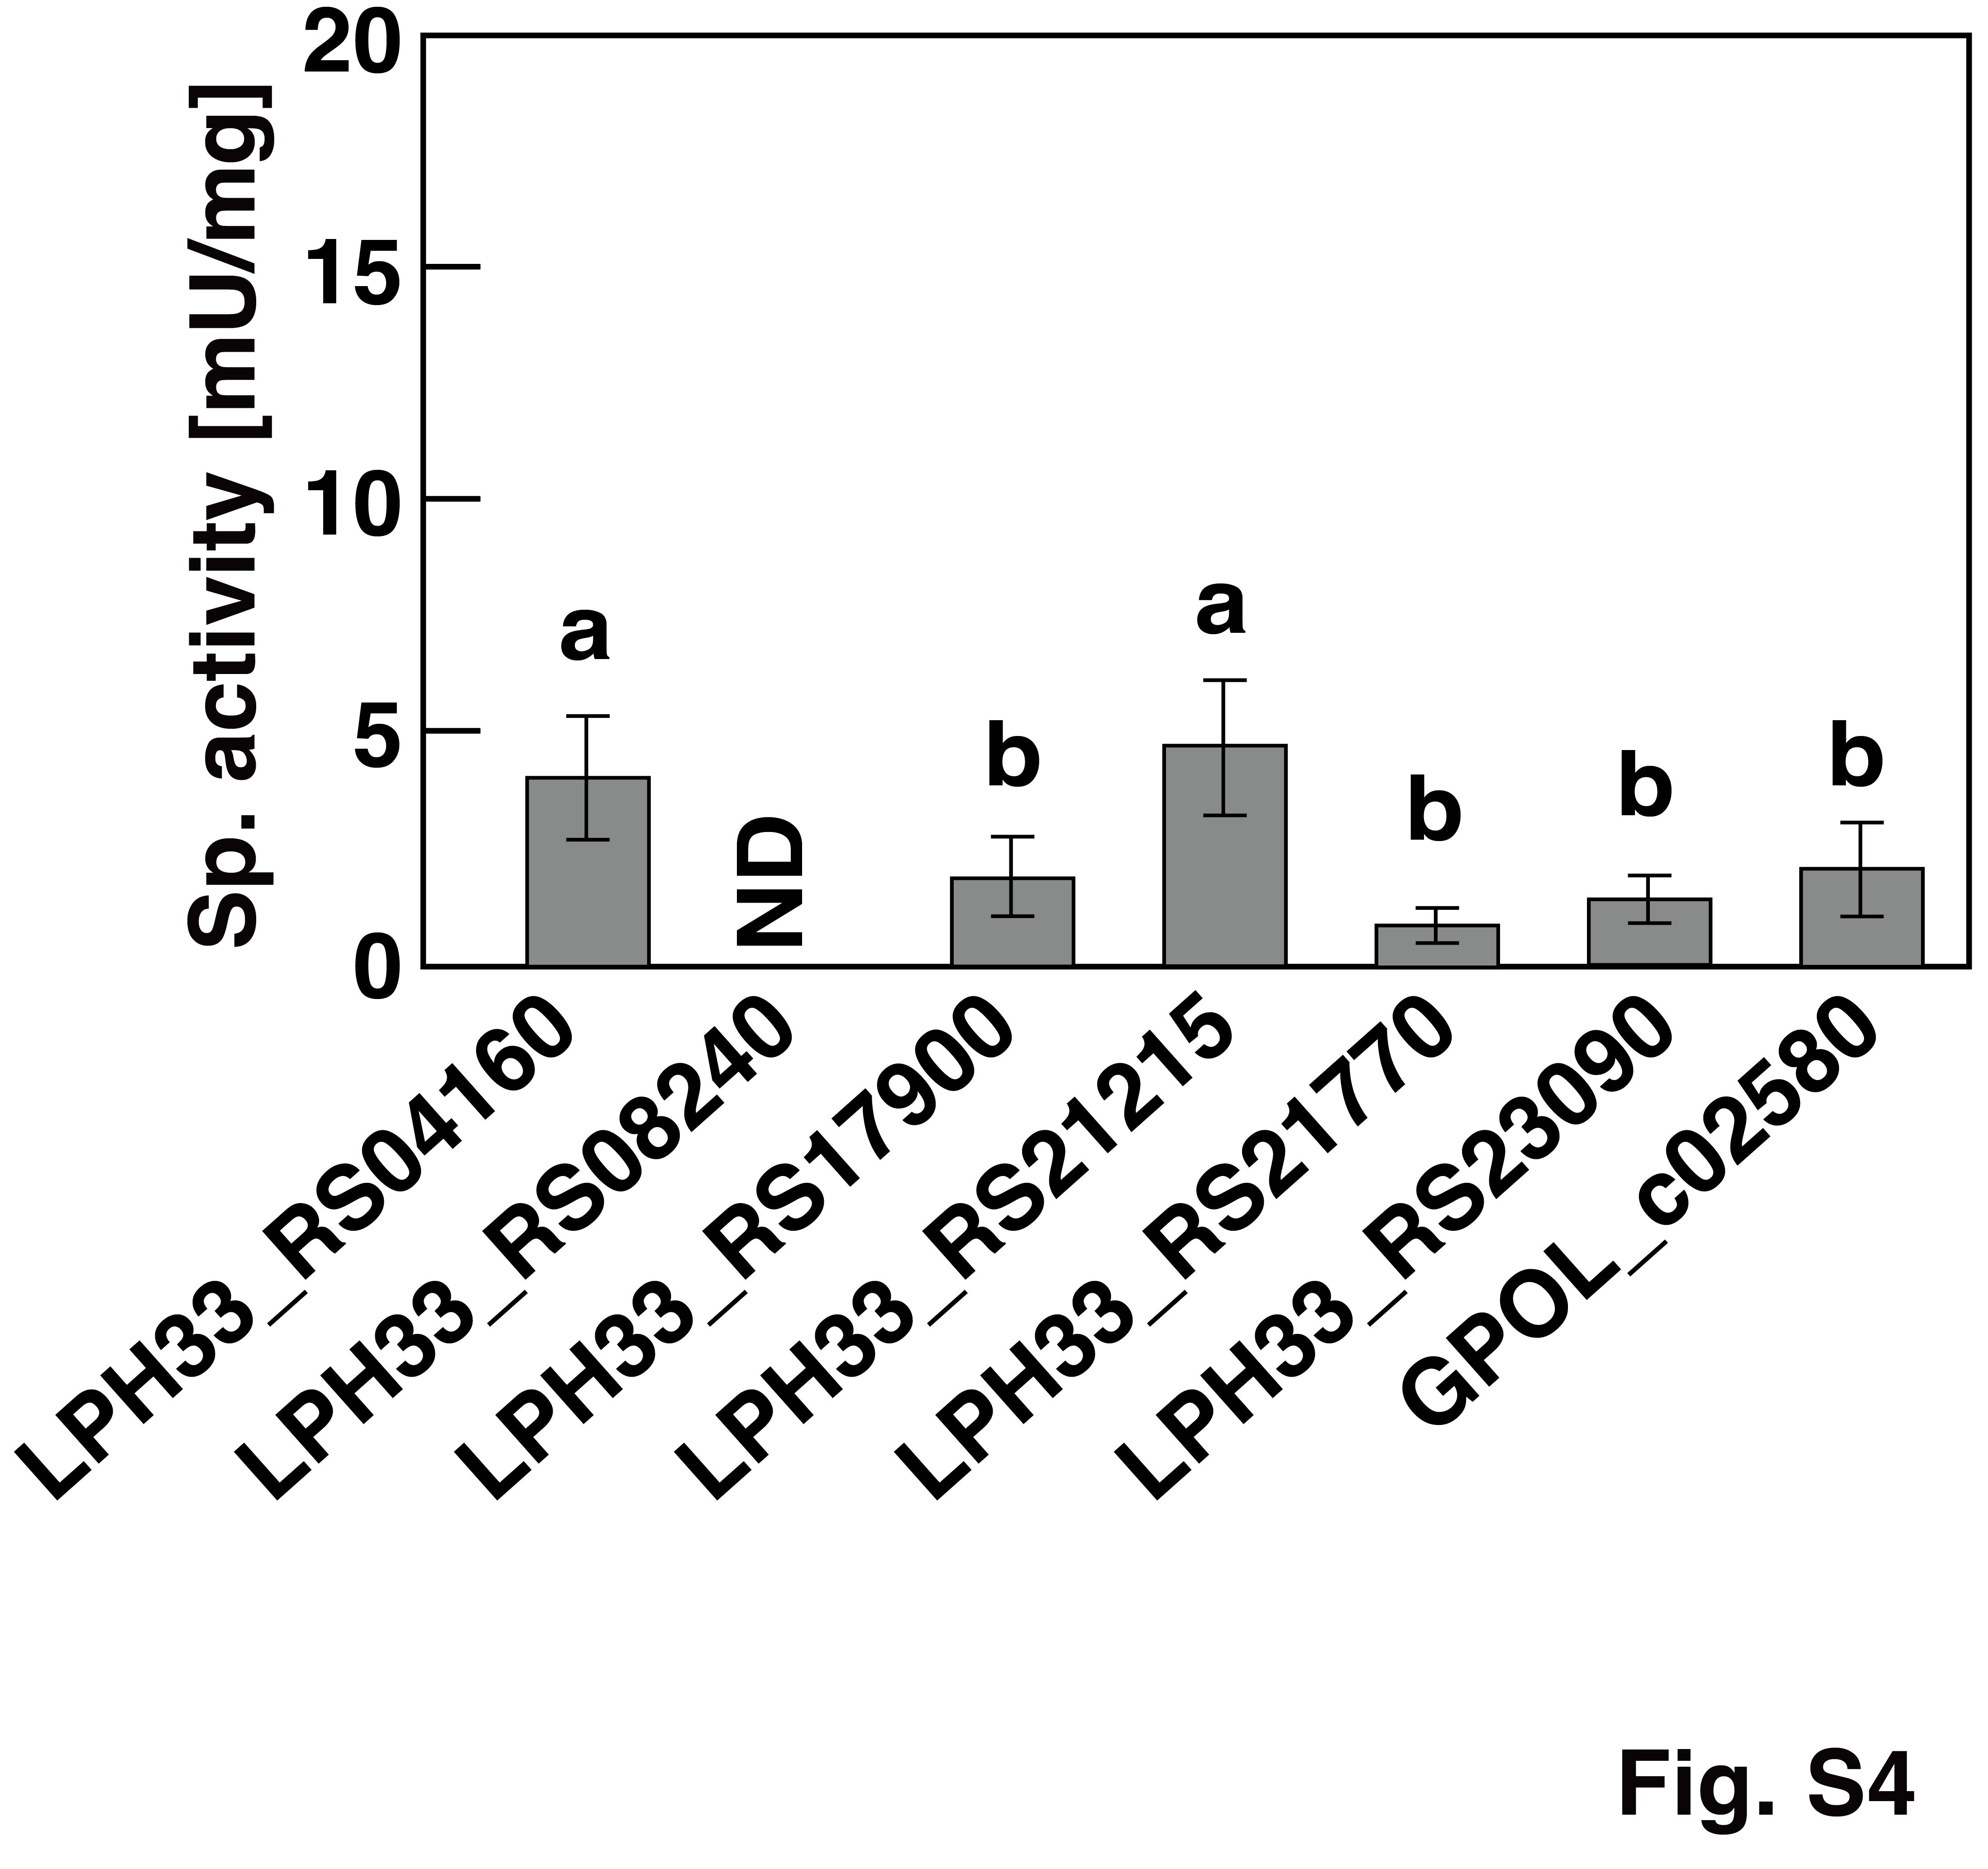


**Fig. S4.** ALDH activities of the six ALDH candidates from *Rhodococcus* sp. RDE2 and AldhGPOL_c02580 (from *G. polyisoprenivorans* VH2) toward OIA in the presence of 200 µM NADP+. Reactions were performed in 50 mM Tris-HCl (pH 7.0). ND, not detected. Data are presented as the mean ± standard deviation of n = 5 independent experiments. Different letters above the bars denote groups that are significantly different (*p* < 0.05) by one-way ANOVA followed by Tukey's HSD test. **The LPH33_RS08240 sample (ND) was excluded from the statistical analysis.**


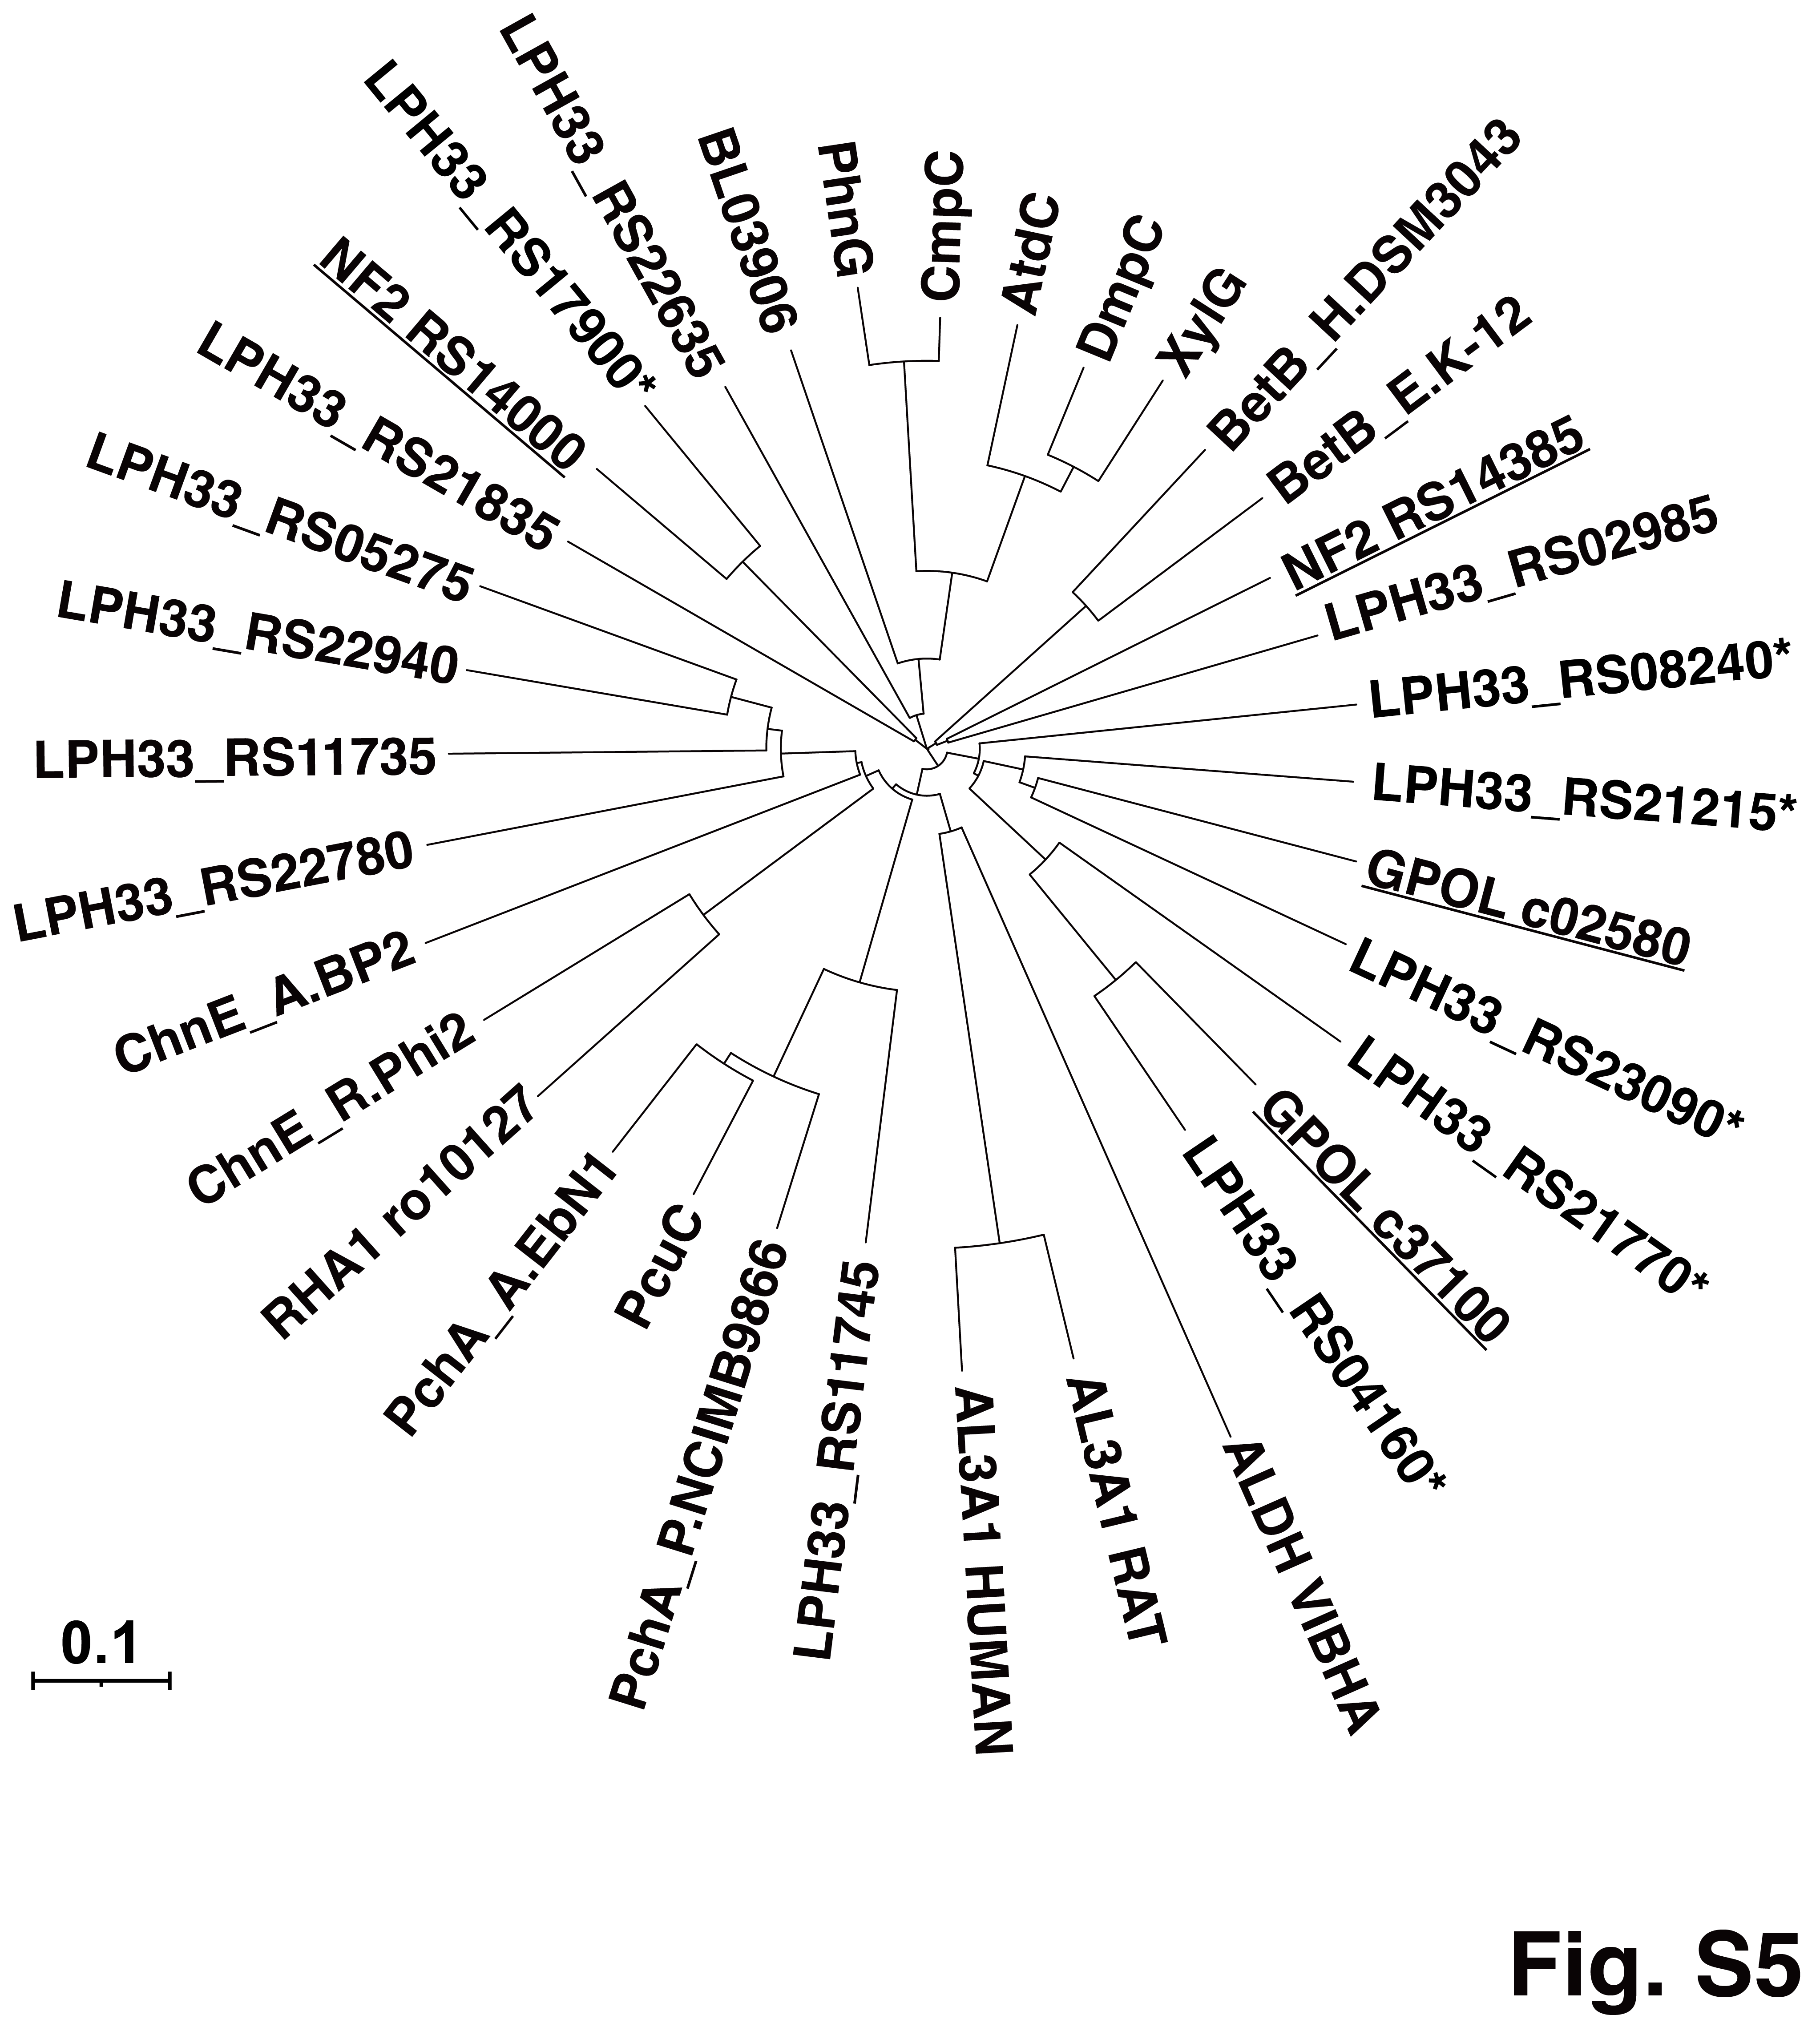


**Fig. S5.** Phylogenetic tree of the putative ALDHs of strain RDE2 with characterized bacterial and eukaryotic ALDHs. The scale corresponds to a genetic distance of 0.1 substitution per position (10% difference). Asterisks indicate the ALDHs of strain RDE2 (LPH33_RS locus tags) analyzed in this study; underlined entries indicate ALDHs that have previously been shown to be involved in PI degradation. Enzymes: GPOL_c02580 and GPOL_c37100, OIA dehydrogenases of *G. polyisoprenivorans* VH2 (AFA71331 and AFA74722, respectively); NF2_RS14000 and NF2_RS14385, OIA dehydrogenases of *N. farcinica* NBRC 15532 (WP_011209527 and WP_060593491); BL03906, putative ALDH of *Bacillus licheniformis* ATCC 14580 (AAU25432); PhnG, 2-hydroxymuconic semialdehyde dehydrogenase (HMSDH) of *Pseudomonas* sp. DJ77 (AAC45993); CmpC, HMSDH of *Sphingomonas* sp. HV3 (CAB06615); AtdC, HMSDH of *Acinetobacter* sp. YAA (BAA23556); DmpC, HMSDH of *Pseudomonas* sp. CF600 (BAP28474); XylG, HMSDH encoded on TOL plasmid pWW0 of *Pseudomonas putida* (CAC86805); BetB_H.DSM3043, betaine ALDH of *Halomonas elongata* DSM 3043 (CAB77175); BetB_E.K-12, betaine ALDH of *E. coli* K-12 (NP_414846); ChnE_A.BP2, 6-oxohexanoate dehydrogenase of *Arthrobacter* sp. BP2 (AAG10022); ChnE_R.Phi2, 6-oxohexanoate dehydrogenase of *Rhodococcus* sp. Phi2 (AAN37492); RHA1_ro10127, putative ALDH of *Rhodococcus jostii* RHA1 (ABH00320); PchA_P.NCIMB9866, *p*-hydroxybenzaldehyde dehydrogenase of *Pseudomonas putida* NCIMB 9866 (AGO01127); PchA_A.EbN1, ALDH of *Aromatoleum aromaticum* EbN1 (CAI07900); PcuC, *p*-hydroxybenzaldehyde dehydrogenase of *Ectopseudomonas mendocina* (AAM92190); AL3A1_HUMAN, ALDH of *Homo sapiens* (P30838); AL3A1_RAT, ALDH of *Rattus norvegicus* (P11883); and ALDH_VIBHA, ALDH of *Vibrio harveyi* (P42040).


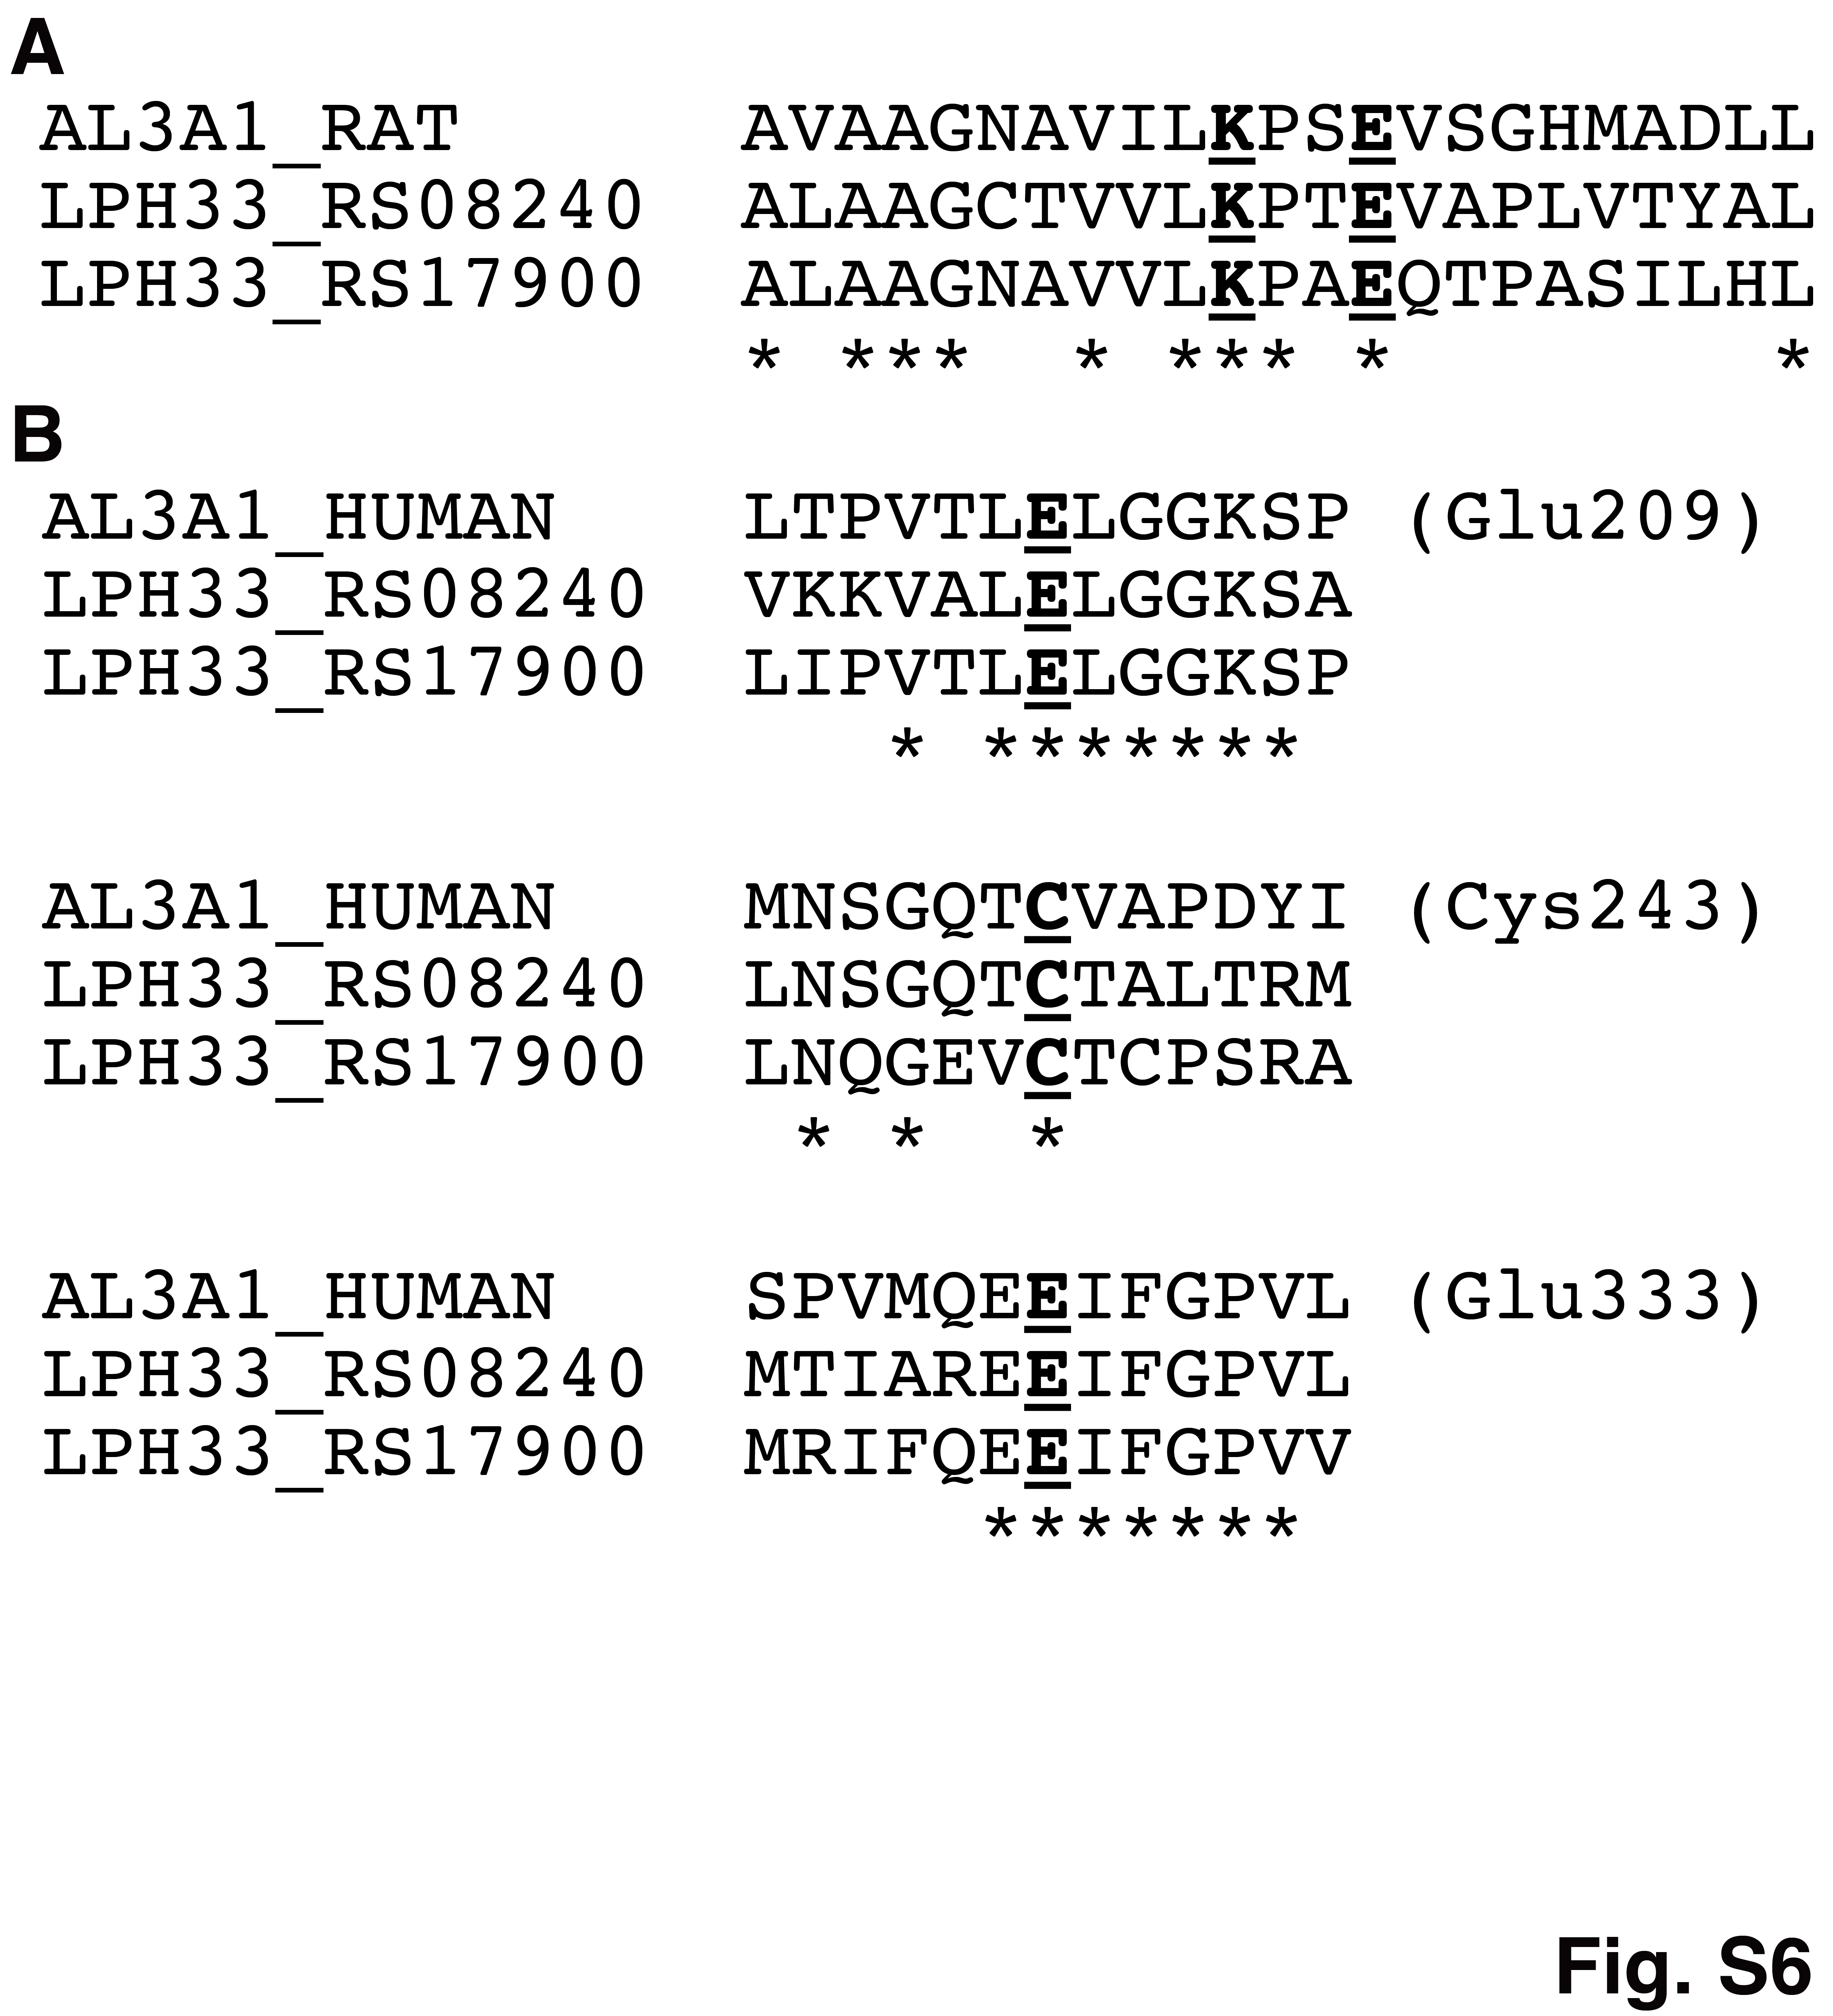


**Fig. S6.** Multiple sequence alignment of conserved catalytic and cofactor-binding residues of LPH33_RS08240 and LPH33_RS17900 with reference class 3 aldehyde dehydrogenases. (A) Alignment of the cofactor-discriminating region containing the conserved Lys and Glu residues corresponding to Lys137 and Glu140 of rat class 3 aldehyde dehydrogenase (AL3A1_RAT; UniProt P11883). (B) Alignment of three conserved catalytic regions: the region containing the activating Glu residue corresponding to Glu209 of human class 3 aldehyde dehydrogenase (AL3A1_HUMAN; UniProt P30838) (upper panel); the region containing the catalytic Cys residue corresponding to Cys243 of AL3A1_HUMAN (middle panel); and the region containing the second activating Glu residue corresponding to Glu333 of AL3A1_HUMAN (lower panel). Residues important for catalysis and cofactor binding are shown in bold and underlined. Asterisks below the alignments indicate identical residues across all sequences.

**References**

Gibu N, Linh DV, Suzuki N, et al. Identification and transcriptional analysis of poly(*cis*-1,4-isoprene) degradation gene in *Rhodococcus* sp. strain RDE2. J Biosci Bioeng. 2022 May;133(5):452–458.

Schäfer A, Tauch A, Jäger W, et al. Small mobilizable multi-purpose cloning vectors derived from the *Escherichia coli* plasmids pK18 and pK19: selection of defined deletions in the chromosome of *Corynebacterium glutamicum*. Gene. 1994 145(1):69-73.

Simon R, Priefer U, Pühler A. A broad host range mobilization system for in vivo genetic engineering: Transposon mutagenesis in gram negative bacteria. Nat Biotechnol. 1983 1:784-791.
