# Supplementary material
Source: Research Square preprint supplement (doi:10.21203/rs.3.rs-10297474/v1)
Supplement: Supplementary file 2 [file 9b41d043adefb4c3826ad2b3.docx]

| Table 1. Six ALDH candidates of *Rhodococcus* sp. RDE2 selected by sequence similarity and phylogeny to OIA-oxidizing ALDHs of strains VH2 and NBRC 15532, and their basal transcript abundance under PI-non-induced conditions. | | | | | |
| --- | --- | --- | --- | --- | --- |
| Locus tag | Mw (kDa) a | Closest reference b | Identity (%) | Signal peptide c | Basal expression d |
| LPH33_RS04160 | 51.9 | GPOL_c37100 | 75.5 | None | 0.147 ± 0.062 |
| LPH33_RS08240 | 49.9 | GPOL_c37100 | 42.1 | None | 2.83 ± 0.44 |
| LPH33_RS21770 | 53.2 | GPOL_c37100 | 52.4 | None | 0.075 ± 0.011 |
| LPH33_RS21215 | 51.2 | GPOL_c02580 | 51.9 | None | 0.030 ± 0.012 |
| LPH33_RS23090 | 51.1 | GPOL_c02580 | 49.9 | None | 0.0016 ± 0.0004 |
| LPH33_RS17900 | 55.1 | NF2_RS14000 | 73.9 | None | 0.449 ± 0.285 |
| Highlighted rows indicate the two ALDHs (LPH33_RS08240 and LPH33_RS17900) identified in this study as the principal NAD+-dependent OIA dehydrogenases of RDE2. a Theoretical molecular weight calculated from the deduced amino acid sequence. b The closest reference among the four characterized OIA-oxidizing ALDHs (GPOL_c02580 and GPOL_c37100 from *G. polyisoprenivorans* VH2; NF2_RS14000 and NF2_RS14385 from *N. farcinica* NBRC 15532) by pairwise BLASTP, with the corresponding amino acid identity (%).c Predicted by SignalP-6.0 (Teufel et al. 2022). d Basal transcript abundance under PI-non-induced conditions, given in each cell as the copy-number ratio (mean ± SD, n = 5) relative to *recA* (Fig. S2). None of the six candidates was significantly induced by DPNR (*p* > 0.05 by two-tailed Student's *t*-test for all candidates; differences between conditions within ~2-fold). | | | | | |

| Table 2. Comparison of OIA-oxidizing ALDHs in three rubber-degrading actinomycetes: *G. polyisoprenivorans* VH2, *N. farcinica* NBRC 15532, and *Rhodococcus* sp. RDE2. | | | | |
| --- | --- | --- | --- | --- |
| Strain | OIA-oxidizing ALDH(s) | Cofactor preference | Knockout phenotype | Reference |
| *G. polyisoprenivorans* VH2 | GPOL_c02580 GPOL_c37100 | NAD+  (sole cofactor assayed) | Quintuple knockout (five ALDH genes) retains residual growth on PI | (Vivod et al. 2017) |
| *N. farcinica*  NBRC 15532 | NF2_RS14000 NF2_RS14385 | NAD+  (sole cofactor assayed) | Double knockout (NF2_RS14000 × NF2_RS14385) retains residual growth on PI | (Suzuki et al. 2022) |
| *Rhodococcus* sp. RDE2 | LPH33_RS08240 LPH33_RS17900 | NAD+  (NADP+ ~37% of NAD+) | Double knockout (LPH33_RS08240 × LPH33_RS17900): reduced growth on NR and reduced OIA-oxidation activity, but not abolished | This study |
| The table summarizes the OIA-oxidizing ALDHs characterized in three rubber-degrading actinomycetes. In all three strains, NAD+ was used as the cofactor in the original biochemical characterization of the purified ALDHs, and the corresponding multi-gene knockouts retained residual growth on natural rubber or its derivatives, indicating that the ALDH repertoire of each strain extends beyond the enzymes identified to date. | | | | |
